# Supplementary material for: CsAlB3O6Cl: the rational construction of a KBBF-type structure with aligned 2∞[AlB3O6Cl] layers via introducing unprecedented [AlO3Cl] tetrahedra
Source: Royal Society of Chemistry journal article supplement (doi:10.1039/d4cc01827c), 2024-01-01
Supplement: d4cc01827c1.pdf [file d4cc01827c1.pdf]

## Electronic Supplementary Information

### **CsAlB<sub>3</sub>O<sub>6</sub>Cl: The rational construction of a KBBF-type structure with aligned $^2_{\infty}$ [AlB<sub>3</sub>O<sub>6</sub>Cl] layers via introducing unprecedented [AlO<sub>3</sub>Cl] tetrahedra**

Haoran Liu,<sup>a,b,+</sup> Jiahao Jiao,<sup>a,b,+</sup> Abudukadi Tudi,<sup>a,b</sup> Qingyu Liu,<sup>a,b</sup> Zhihua Yang,<sup>a,b</sup>  
Shilie Pan<sup>a,b,\*</sup> and Min Zhang<sup>a,b,\*</sup>

<sup>a</sup> Research Center for Crystal Materials; State Key Laboratory of Functional Materials and Devices for Special Environmental Conditions; Xinjiang Key Laboratory of Functional Crystal Materials; Xinjiang Technical Institute of Physics and Chemistry, CAS,  
40-1 South Beijing Road, Urumqi 830011, China.

<sup>b</sup> Center of Materials Science and Optoelectronics Engineering, University of Chinese Academy of Sciences, Beijing, 100049, China.

\*Corresponding authors, E-mails: slpan@ms.xjb.ac.cn and zhangmin@ms.xjb.ac.cn.

## Experimental Section

**1. Single crystals and polycrystalline.** CsAlB<sub>3</sub>O<sub>6</sub>Cl crystals can be obtained by the high-temperature solution method in a closed system. CsCl (99.5 %), Al<sub>2</sub>O<sub>3</sub> (99.99 %), and B<sub>2</sub>O<sub>3</sub> (99.99 %) were purchased from Aladdin Chemical Industry Co., Ltd. The reactants CsCl, Al<sub>2</sub>O<sub>3</sub>, and B<sub>2</sub>O<sub>3</sub> were weighed according to the molar ratio of 1: 0.5: 1.5, and then loaded into a quartz tube of  $\Phi 10\text{ mm} \times 120\text{ mm}$  after grinding uniformly, and then vacuumed with a vacuum pump to make the vacuum inside the tube  $1 \times 10^{-3}$  Pa, and then sealed with a high-temperature flame gun on the quartz tube. The encapsulated quartz tube was placed into a high-temperature muffle furnace, which was raised to 700 °C for 10 h and held for 15 h. The temperature was lowered to 650 °C at a rate of 1.0 °C/h, then to 600 °C at a rate of 0.5 °C/h, and then to 500 °C at a rate of 1 °C/h. The muffle furnace was closed, and the crystals inside the quartz tube were taken out for structural determination when the temperature was lowered to room temperature. The polycrystalline powder sample of the compound CsAlB<sub>3</sub>O<sub>6</sub>Cl was obtained by direct grinding of the sample inside the quartz tube, and the purity of the sample was examined by powder X-ray diffraction (XRD), which reveals the presence of a small amount of unreacted CsCl impurity phase.

**2. Characterization.** Powder XRD data were collected with a Bruker D2 PHASER diffractometer (Cu K $\alpha$  radiation with  $\lambda = 1.5418\text{ \AA}$ ,  $2\theta = 10$  to  $70^\circ$ , scan step width =  $0.02^\circ$ , and counting time = 1 s/step). The single-crystal XRD data were collected on a Bruker D8 Venture diffractometer using Mo K $\alpha$  radiation ( $\lambda = 0.71073\text{ \AA}$ ) at room temperature. The intensity, reduction, and cell refinement were carried out on Bruker SAINT.<sup>1</sup> All the structures were solved by direct method and refined through the full-matrix least-squares fitting on  $F^2$  with OLEX2 software.<sup>2</sup> These structures were verified by virtue of the ADDSYM algorithm from PLATON.<sup>3</sup> The Cs(2) atom has an occupancy of 0.167, which is located not only on the threefold inversion axis but also at the center of symmetry, with the disorder existing to satisfy the bond valence equilibrium.

Infrared spectroscopy was carried out on a Shimadzu IR Affinity-1 Fourier transform infrared spectrometer in the  $400\text{--}4000\text{ cm}^{-1}$  range. UV–vis–NIR diffuse-reflectance

spectroscopy data in the wavelength range of 175-2600 nm were recorded at room temperature using a powder sample of CsAlB<sub>3</sub>O<sub>6</sub>Cl on a Shimadzu SolidSpec-3700 DUV spectrophotometer. Energy Dispersive X-ray Spectroscopy (EDS) was measured on a SUPRA 55VP field emission scanning electron microscope equipped with a BRUKER X-ray Flash-SDD-5010 energy-dispersive X-ray spectroscopy. As crystals are preserved in dimethyl-silicon oil, small amounts of C elements are present. We have measured the experimental birefringence of CsAlB<sub>3</sub>O<sub>6</sub>Cl by using polarizing microscopy. The CsAlB<sub>3</sub>O<sub>6</sub>Cl crystal with a thickness of 15.679  $\mu\text{m}$  and retardation value of 854.79 nm can be obtained from the tables of the Berek compensator specification. Furthermore, the difference between refractive indices values of the crystal plane is 0.055 at 546.1 nm. This measured refractive index difference is smaller than the actual birefringence since the direction of the natural growth plane of the crystals is always not along a specific optical principal axis, which verifies the reasonableness of the theoretical calculations.

### 3. Calculation details

The electronic structure and optical properties were calculated by using the DFT method implemented in the CASTEP package.<sup>4</sup> During the calculation, the generalized gradient approximation (GGA) with Perdew-Burke-Ernzerhof (PBE) functional was adopted.<sup>5a</sup> Under the norm-conserving pseudopotential (NCP), due to discontinuities in the exchange-correlation energies, the GGA usually underestimates the bandgap. Therefore the Heyd-Scuseria-Ernzerhof (HSE06) hybrid function was chosen to provide a more accurate bandgap value. Therefore, the bandgap difference between the GGA and the experimental value or the HSE06 method was used as the scissor operation to calculate the optical properties. The cutoff energy of the plane wave was set to 850 eV for the self-consistent field (SCF) calculations, the convergence criterion for the total energy was  $10^{-6}$  eV/atom. In the Brillouin zone, the  $k$ -point separation was set to  $0.07 \text{ \AA}^{-1}$  for each material, resulting in a corresponding Monkhorst-Pack  $k$ -point grid. The linear optical properties are obtained from the dielectric function:  $\varepsilon(\omega) = \varepsilon_1(\omega) + i\varepsilon_2(\omega)$ , where  $\varepsilon_1(\omega)$  and  $\varepsilon_2(\omega)$  are the real and imaginary parts of the dielectric function, respectively. The imaginary part  $\varepsilon_2$  of the dielectric function can be calculated from the electronic

structure, while the real part can be obtained from the Cramers-Kronig transform, which allows the calculation of the refractive index and birefringence ( $\Delta n$ ). To clarify the contribution of different units to the birefringence of  $\text{CsAlB}_3\text{O}_6\text{Cl}$ , the bonding electron density difference ( $\Delta\rho$ ) of  $[\text{B}_3\text{O}_6]$ ,  $[\text{AlO}_3\text{Cl}]$ ,  $[\text{CsO}_{12}]$ , and  $[\text{CsCl}_6]$  was calculated using the REDA method. were calculated using the REDA method.<sup>5b</sup>

**Table S1.** Crystallographic data and structural refinement parameters of CsAlB<sub>3</sub>O<sub>6</sub>Cl.

| Compound                                      | CsAlB <sub>3</sub> O <sub>6</sub> Cl       |
|-----------------------------------------------|--------------------------------------------|
| Formula weight                                | 323.77                                     |
| Temperature(K)                                | 293(2)                                     |
| Crystal system                                | Trigonal                                   |
| Space group                                   | $P\bar{3}_c1$                              |
| $a$ (Å)                                       | 7.0716(4)                                  |
| $c$ (Å)                                       | 18.0458(19)                                |
| $V$ (Å <sup>3</sup> )                         | 781.52(12)                                 |
| $Z$                                           | 4                                          |
| $d_{\text{cal}}$ (g/cm <sup>3</sup> )         | 2.752                                      |
| $\mu$ (mm <sup>-1</sup> )                     | 5.170                                      |
| $F(000)$                                      | 592                                        |
| Crystal size (mm <sup>3</sup> )               | 0.252 × 0.172 × 0.080                      |
| Theta range for data collection               | 2.257 to 27.451°                           |
| Limiting indices                              | -9 ≤ $h$ ≤ 9, -9 ≤ $k$ ≤ 8, -23 ≤ $l$ ≤ 23 |
| Reflections collected / unique                | 3595/606 [ $R(\text{int}) = 0.0447$ ]      |
| Completeness                                  | 100.0 %                                    |
| Data / restraints / parameters                | 606 / 0 / 45                               |
| Goodness-of-fit on $F^2$                      | 1.252                                      |
| $R_1$ ( $I > 2\sigma(I)$ ) <sup>[a]</sup>     | 0.0317                                     |
| $wR_2$ ( $I > 2\sigma(I)$ ) <sup>[a]</sup>    | 0.0771                                     |
| $R_1$ (all data) <sup>[a]</sup>               | 0.0399                                     |
| $wR_2$ (all data) <sup>[a]</sup>              | 0.0802                                     |
| Largest diff. peak and hole e.Å <sup>-3</sup> | 0.577 and -0.439                           |

$$^{[a]}R_1 = \Sigma ||F_o| - |F|| / \Sigma |F_o| \text{ and } wR_2 = [\Sigma w(F_o^2 - F_c^2)^2 / \Sigma w F_o^4]^{1/2}$$

**Table S2.** Atomic coordinates ( $\times 10^4$ ), equivalent isotropic displacement parameters ( $\text{\AA}^2 \times 10^3$ ), and the bond valence sum for CsAlB<sub>3</sub>O<sub>6</sub>Cl.

| Atoms | <i>x</i> | <i>y</i> | <i>z</i> | $U_{\text{(eq)}}$ | S.O.F. | BVS  |
|-------|----------|----------|----------|-------------------|--------|------|
| Cs(1) | 0        | 0        | 2500     | 25(1)             |        | 1.26 |
| Cs(2) | 530(40)  | 480(50)  | 4833(2)  | 88(2)             | 0.167  | /    |
| Al(1) | 6667     | 3333     | 3696(1)  | 21(1)             |        | 3.02 |
| B(1)  | 4941(7)  | 6090(8)  | 3396(3)  | 24(1)             |        | 3.07 |
| O(1)  | 2753(5)  | 4500(5)  | 3386(2)  | 27(1)             |        | 2.13 |
| O(2)  | 6509(4)  | 5572(5)  | 3414(2)  | 34(1)             |        | 2.03 |
| Cl(1) | 6667     | 3333     | 4888(1)  | 78(1)             |        | 1.13 |

**Table S3.** Selected bond lengths (Å) and angles (°) for CsAlB<sub>3</sub>O<sub>6</sub>Cl.

| Bond          | Length   | Bond           | Length    |
|---------------|----------|----------------|-----------|
| Cs(1)-O(1)#1  | 3.206(3) | Cs(2)-Cl(1)    | 3.76(3)   |
| Cs(1)-O(1)#2  | 3.206(3) | Cs(2)-Cl(1)#16 | 3.83(3)   |
| Cs(1)-O(1)#3  | 3.206(3) | Cs(2)-O(1)     | 3.592(19) |
| Cs(1)-O(1)#4  | 3.206(3) | Cs(2)-O(2)#9   | 3.79(4)   |
| Cs(1)-O(1)#5  | 3.206(3) | Cs(2)-O(2)#11  | 3.66(3)   |
| Cs(1)-O(1)    | 3.206(3) |                |           |
| Cs(1)-O(2)#6  | 3.300(3) | Al(1)-O(2)#11  | 1.719(3)  |
| Cs(1)-O(2)#7  | 3.300(3) | Al(1)-O(2)     | 1.719(3)  |
| Cs(1)-O(2)#8  | 3.300(3) | Al(1)-O(2)#18  | 1.719(3)  |
| Cs(1)-O(2)#9  | 3.300(3) | Al(1)-Cl(1)    | 2.150(3)  |
| Cs(1)-O(2)#10 | 3.300(3) |                |           |
| Cs(1)-O(2)#11 | 3.300(3) | B(1)-O(1)#9    | 1.376(6)  |
|               |          | B(1)-O(1)      | 1.385(5)  |
|               |          | B(2)-O(1)      | 1.331(5)  |

---

| Type                  | Angle      | Type              | Angle    |
|-----------------------|------------|-------------------|----------|
| O(2)#11-Al(1)-O(2)    | 111.60(12) | O(1)#23-B(1)-O(1) | 119.1(4) |
| O(2)#18-Al(1)-O(2)    | 111.60(12) | O(2)-B(1)-O(1)#23 | 119.4(4) |
| O(2)#18-Al(1)-O(2)#11 | 111.60(12) | O(2)-B(1)-O(1)    | 121.5(4) |
| O(2)#18-Al(1)-Cl(1)   | 107.25(13) |                   |          |
| O(2)#11-Al(1)-Cl(1)   | 107.25(13) |                   |          |
| O(2)-Al(1)-Cl(1)      | 107.25(13) |                   |          |

Symmetry transformations used to generate equivalent atoms:

#1 x-y,-y,-z+1/2 #2 -y,x-y,z #3 -x+y,-x,z  
 #4 -x,-x+y,-z+1/2 #5 y,x,-z+1/2 #6 y-1,x-1,-z+1/2  
 #7 -x+1,-x+y,-z+1/2 #8 x-y,-y+1,-z+1/2 #9 -x+y,-x+1,z  
 #10 x-1,y-1,z #11 -y+1,x-y,z #12 x-y,x,-z+1  
 #13 -x,-y,-z+1 #14 y,-x+y,-z+1 #15 -x+1,-y,-z+1  
 #16 -x+1,-y+1,-z+1 #17 x-1,y,z #18 -x+y+1,-x+1,z  
 #19 x+1,y,z #20 x-y+1,x,-z+1 #21 y+1,-x+y+1,-z+1  
 #22 x+1,y+1,z #23 -y+1,x-y+1,z

**Table S4.** Bonding electron density difference ( $\Delta\rho$ ) and contribution percent  $w$  (%) of different units in CsAlB<sub>3</sub>O<sub>6</sub>Cl calculated by the REDA method.

| Units                            | $\Delta\rho (\times 10^4)$ | $w$ (%) |
|----------------------------------|----------------------------|---------|
| [B <sub>3</sub> O <sub>6</sub> ] | 234.5                      | 92.70   |
| [AlO <sub>3</sub> Cl]            | 5.7                        | 2.26    |
| [Cs(1)O <sub>12</sub> ]          | 8.1                        | 3.23    |
| [Cs(2)Cl <sub>6</sub> ]          | 4.5                        | 1.81    |



**Figure S1.** The structures of CsB<sub>4</sub>O<sub>6</sub>F (a), CsAlB<sub>3</sub>O<sub>6</sub>F (b), CsKB<sub>8</sub>O<sub>12</sub>F<sub>2</sub> (c), and CsAlB<sub>3</sub>O<sub>6</sub>Cl (d).

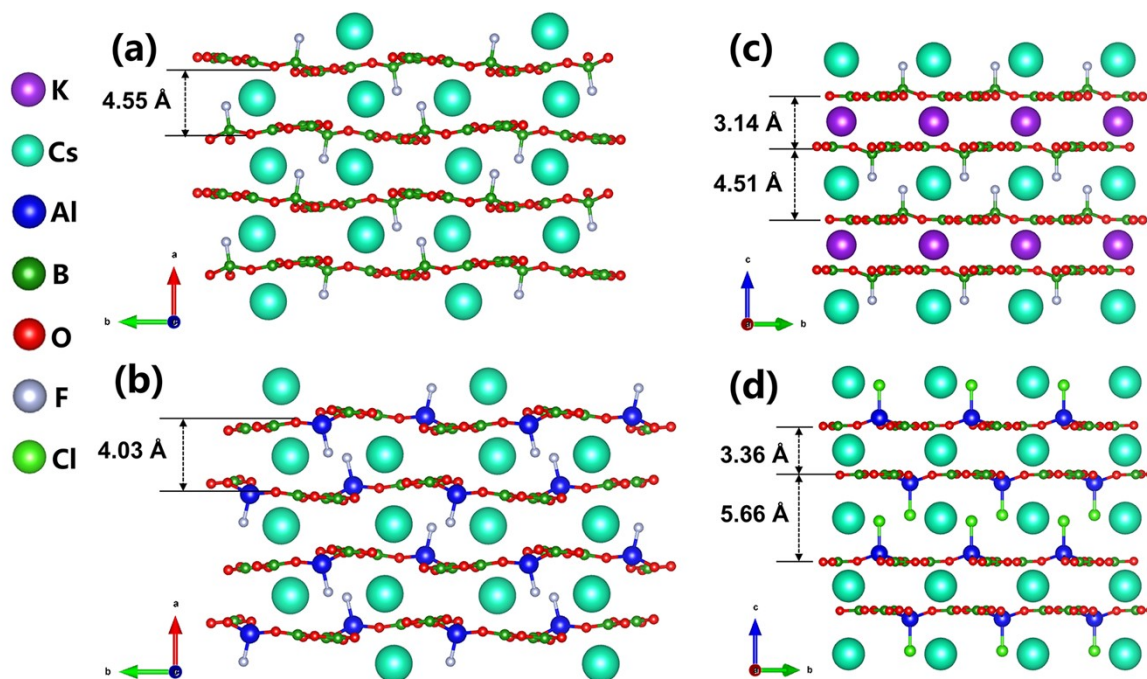

**Figure S2.** Powder X-ray diffraction patterns of experimental and calculated results for  $\text{CsAlB}_3\text{O}_6\text{Cl}$ .

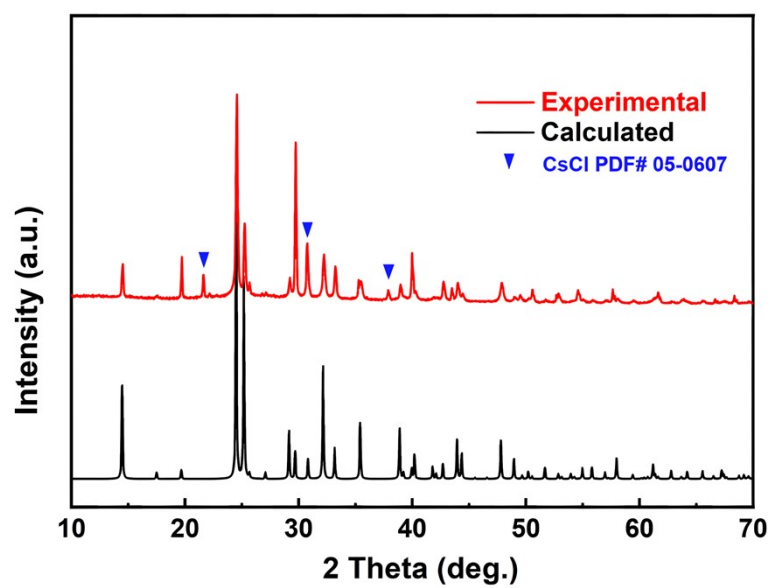

**Figure S3.** (a) The experimental and calculated XRD patterns of  $\text{CsAlB}_3\text{O}_6\text{Cl}$  at different temperatures. (b) The TG-DSC curves of  $\text{CsAlB}_3\text{O}_6\text{Cl}$ .

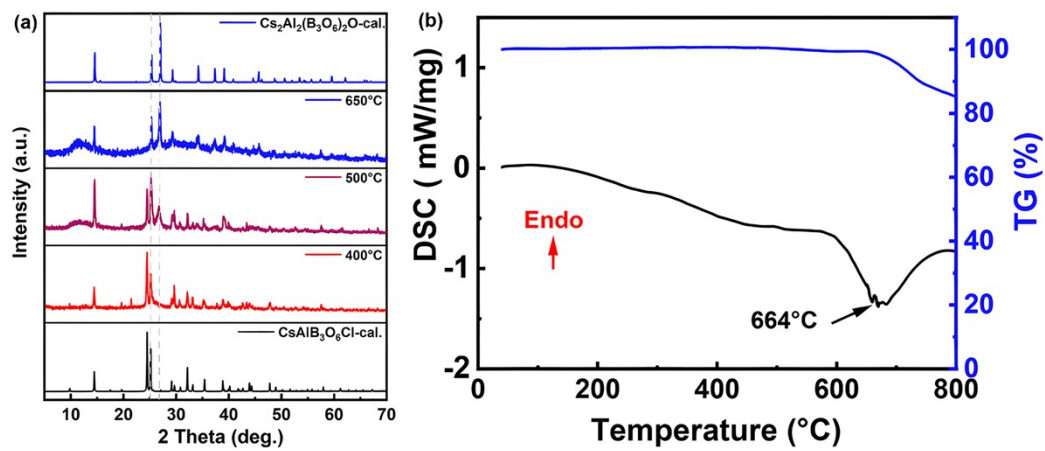

**Figure S4.** The energy dispersive X-ray spectrum of  $\text{CsAlB}_3\text{O}_6\text{Cl}$ .

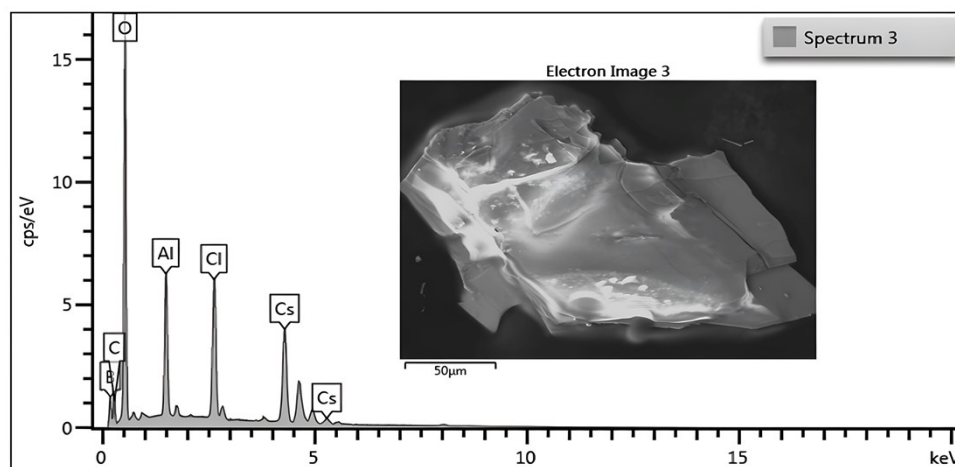

**Figure S5.** The IR spectrum of  $\text{CsAlB}_3\text{O}_6\text{Cl}$ . (a) The experimental and calculated IR spectrum of  $\text{CsAlB}_3\text{O}_6\text{Cl}$ . (b)-(c) Vibrations at  $819.74\text{ cm}^{-1}$  (b) and  $898.84\text{ cm}^{-1}$  in calculated IR spectrum.

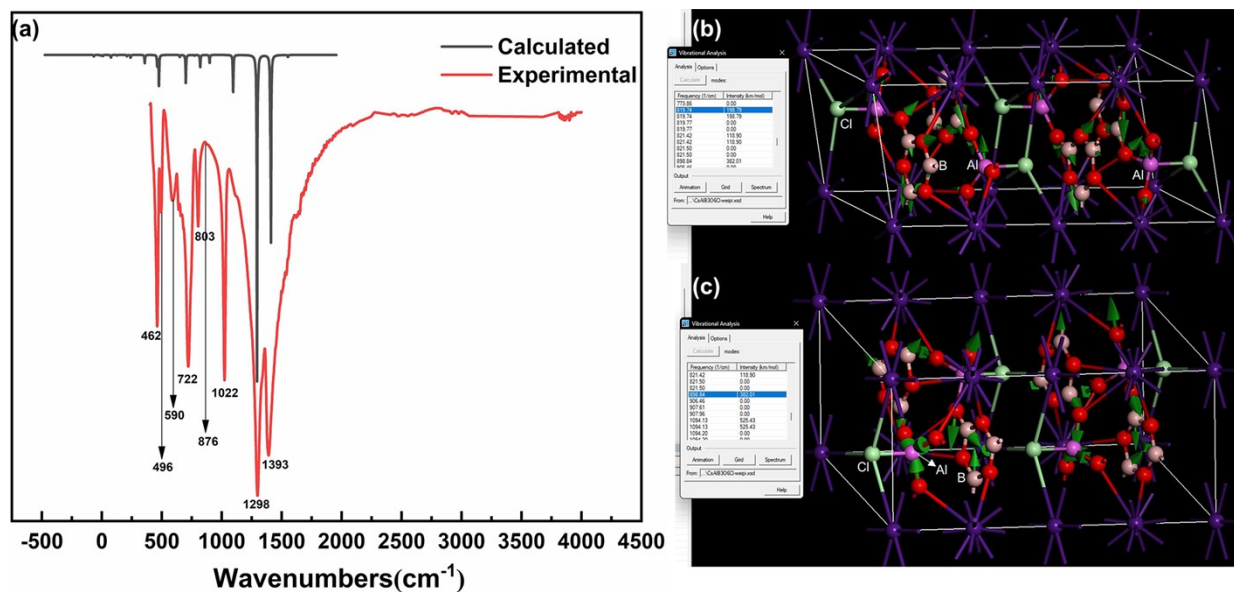

**Figure S6.** The UV-VIS-NIR reflection spectrum of CsAlB<sub>3</sub>O<sub>6</sub>Cl.

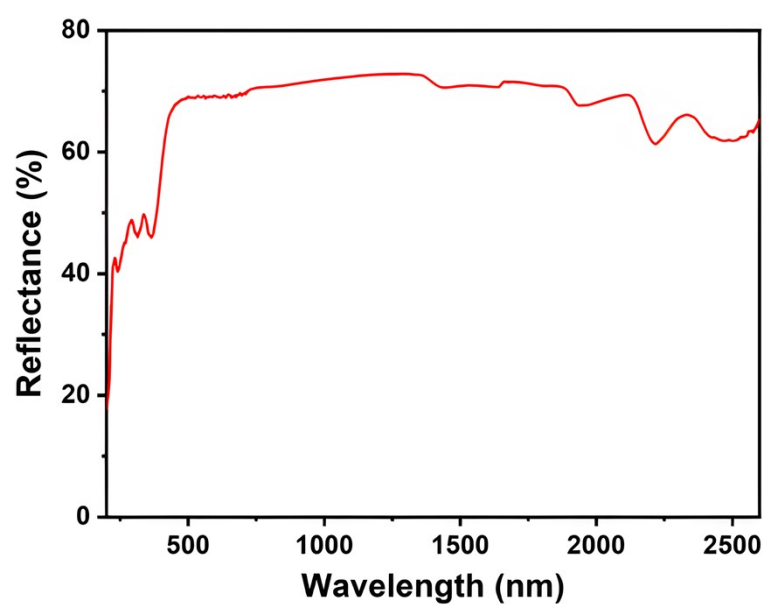

**Figure S7.** The electronic structure of CsAlB<sub>3</sub>O<sub>6</sub>Cl based on GGA method.

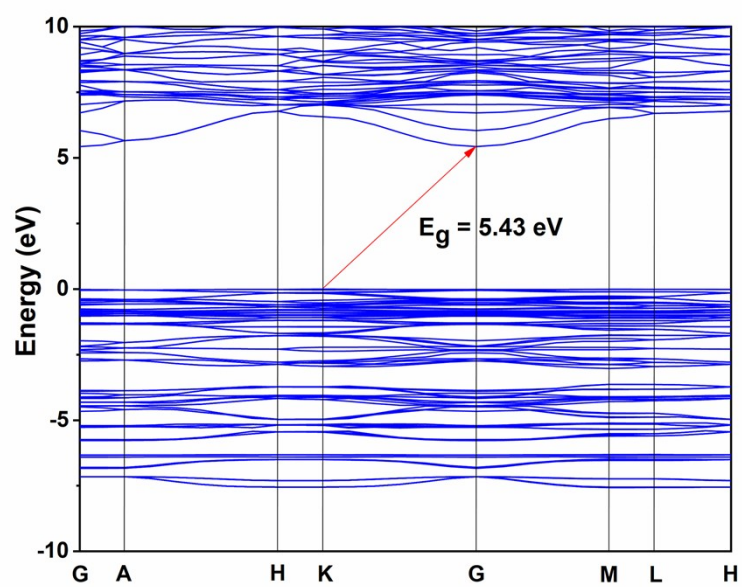

**Figure S8.** The density of states of CsAlB<sub>3</sub>O<sub>6</sub>Cl.

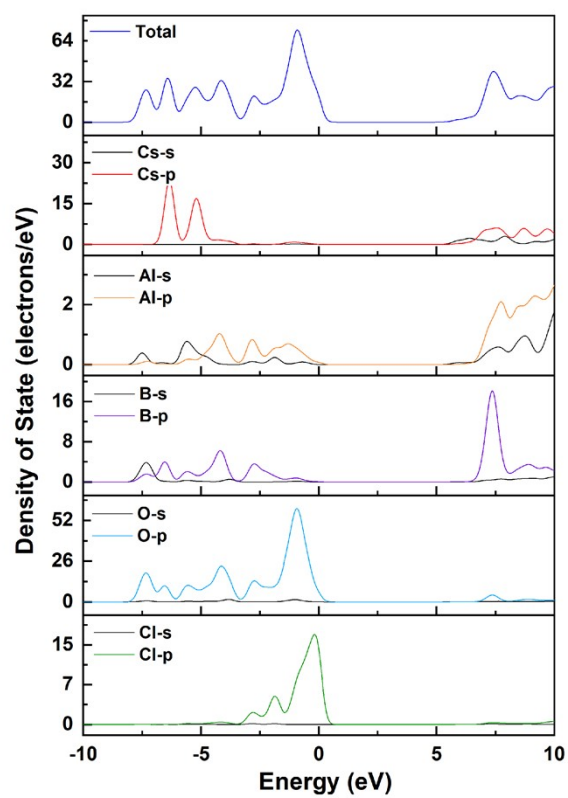



**Figure S9.** Birefringence measurements on the  $\text{CsAlB}_3\text{O}_6\text{Cl}$  crystal. (a)-(b) The photograph of  $\text{CsAlB}_3\text{O}_6\text{Cl}$  crystal under the polarizing microscope, and the (c) thickness of  $\text{CsAlB}_3\text{O}_6\text{Cl}$  crystal.

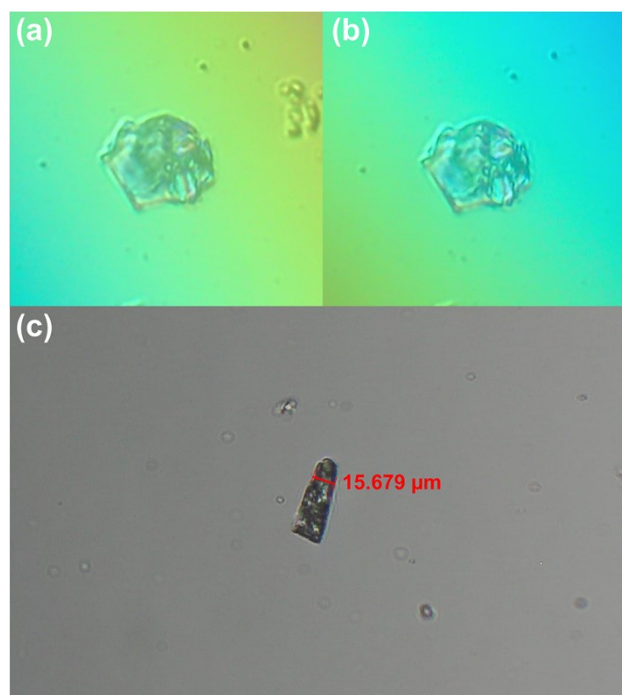

## References

1. SAINT, Version 7.60A, Bruker Analytical X-ray Instruments, Inc., Madison, WI, 2008.
2. O. V. Dolomanov, L. J. Bourhis, R. J. Gildea, J. A. Howard and H. Puschmann, *J. Appl. Crystallogr.*, 2009, **42**, 339-341.
3. A. Spek, *J. Appl. Crystallogr.*, 2003, **36**, 7-13.
4. S. J. Clark, M. D. Segall, C. J. Pickard, P. J. Hasnip, M. I. Probert, K. Refson and M. C. Payne, *Z. Kristallogr. Cryst. Mater.*, 2005, **220**, 567-570.
5. (a) J. P. Perdew, K. Burke and M. Ernzerhof, *Phys. Rev. Lett.*, 1996, **77**, 3865; (b) B. H. Lei, Z. H. Yang and S. L. Pan, *Chem. Commun.*, 2017, **53**, 2818-2821.
